# Supplementary material for: Estimating rates and patterns of diversification with incomplete sampling: a case study in the rosids
Source: PubMed Central journal article supplement — Am J Bot. 2020 Jun 9;107(6):895–909. doi: 10.1002/ajb2.1479 (PMC7384126; doi:10.1002/ajb2.1479), 2020-06-09

**Appendix S3. Justification for comparing speciation rates under different models across different methods.**

This Appendix is in three parts. First (Appendix S3a), we report model-weighted averages of speciation rate across RPANDA models. In some cases, model choice was not decisive, so the purpose of this reanalyzed table is to verify that our reported results are not sensitive to choosing among nearly equal-fit models. The results are very similar to best-model values (cf. Appendix S1a). In many cases, Akaike weights are near 1, indicating decisive model choice. In other cases (e.g., Fabales across all three trees), Akaike weights were less conclusive, but the speciation parameter reported is very similar across models.

The last two parts of this Appendix report analyses restricted to pure-birth models, in contrast to the birth-death RPANDA and BAMM models presented in the main text. We present these as sensitivity analyses, as we only consider speciation rates for our exploration of diversification model performance (cf. Methods for justification of this). While not considering extinction in fully parametric diversification models is an atypical approach for most practitioners, it has the advantage of providing a means to examine models more directly compatible with each other. For instance, a pure-birth BAMM model can be compared to RPANDA analyses where a pure-birth model has the best fit, in order to assure more comparable results. For RPANDA, we reduced the pool of already calculated RPANDA models to only pure-birth models, reporting optimal models and recalculating Akaike weights accordingly (Appendix S3b). For

BAMM, we used the 20k-tip tree to rerun BAMM analyses constrained to a pure-birth model following developer instructions (setting the initial extinction value to 0 and disabling MCMC updates on this parameter (Appendix S3c, S3d). Generally, these sensitivity analyses demonstrate similar patterns to birth-death models for tip speciation rates (Appendix S3c). As with other analyses, tip rates proved more robust than other types of rates to different model specifications, providing additional justification for our focus on this metric (cf. Discussion). However, tree-wide rates were quite different in scaling. Rate-through-time plots (Appendix S3d) show that this is driven primarily by differences in overall scaling of speciation rate at early time intervals, while values at present ( $t = 0$ ) are more similar.

**Appendix S3a. Model-weighted mean speciation rates estimated for 9k-, 20k, and 100k-tip trees and each of 17 rosid orders using RPANDA with nine birth-death models (cf. Appendix S1a).** We calculated a model-weighted mean speciation rate (speciation rate ( $\lambda$ )  $\times$  Akaike weight summed across models).

| Clade           | 9k-tip tree | 20k-tip tree | 100k-tip tree |
|-----------------|-------------|--------------|---------------|
| Brassicales     | 0.7144      | 0.9271       | 0.0471        |
| Celastrales     | 0.8369      | 0.7453       | 0.0522        |
| Crossosomatales | 0.3005      | 0.2991       | 0.1323        |
| Cucurbitales    | 0.6240      | 0.5069       | 0.0296        |
| Fabales         | 1.2963      | 1.2913       | 0.0414        |
| Fagales         | 2.5766      | 2.0042       | 0.0474        |
| Geraniales      | 1.1517      | 0.8535       | 0.0965        |
| Huerteales      | 0.0348      | 0.0388       | 0.3174        |
| Malpighiales    | 0.9611      | 0.9769       | 0.0183        |
| Malvales        | 1.4992      | 1.3757       | 0.0013        |
| Myrtales        | 2.2453      | 2.4115       | 0.0066        |
| Oxalidales      | 1.5338      | 1.0266       | 0.0498        |
| Picramniales    | 0.1594      | 0.1655       | 0.0372        |
| Rosales         | 4.5903      | 3.0646       | 0.0258        |
| Sapindales      | 0.6592      | 0.5344       | 0.0270        |
| Vitales         | 11.1638     | 1.6484       | 0.0191        |
| Zygophyllales   | 0.3754      | 0.2624       | 0.0259        |
| global tree     | 1.3990      | 1.3095       | 0.0446        |

**Appendix S3b. Summary table of speciation rates estimated from RPNADA under three pure-birth models (cf. Methods in Appendix S1a).**

| Clade           | Model     | 9k-tip tree |            | 20k-tip tree |            | 100k-tip tree |             |
|-----------------|-----------|-------------|------------|--------------|------------|---------------|-------------|
|                 |           | lamda       | AICc       | lamda        | AICc       | lamda         | AICc        |
| Brassicales     | bcstd0    | 0.1564      | 3970.2764  | 0.2409       | 11291.7494 | 0.0729        | 44195.0818  |
|                 | bvar.d0   | 0.2653      | 3759.3472  | 0.4068       | 10619.5449 | 0.0556        | 43819.7640  |
|                 | bvar.l.d0 | 0.2205      | 3787.5712  | 0.3077       | 10826.6908 | 0.0471        | 43736.3220  |
| Celastrales     | bcstd0    | 0.1952      | 1520.0735  | 0.1936       | 1994.3127  | 0.0695        | 11339.9374  |
|                 | bvar.d0   | 0.3665      | 1372.7525  | 0.3552       | 1833.1353  | 0.0601        | 11305.8838  |
|                 | bvar.l.d0 | 0.2645      | 1408.8337  | 0.2605       | 1879.9468  | 0.0522        | 11284.7112  |
| Crossosomatales | bcstd0    | 0.0602      | 201.8774   | 0.0597       | 201.5109   | 0.0960        | 550.3687    |
|                 | bvar.d0   | 0.1409      | 189.8818   | 0.1389       | 190.7729   | 0.1419        | 533.4104    |
|                 | bvar.l.d0 | 0.1049      | 191.5032   | 0.0914       | 194.6991   | 0.1290        | 532.7037    |
| Cucurbitales    | bcstd0    | 0.2066      | 3248.1228  | 0.2111       | 5598.7111  | 0.0643        | 24950.9114  |
|                 | bvar.d0   | 0.3547      | 2965.8946  | 0.3262       | 5306.3942  | 0.0323        | 24198.3544  |
|                 | bvar.l.d0 | 0.2637      | 3045.4506  | 0.2579       | 5389.7681  | 0.0313        | 24373.8209  |
| Fabales         | bcstd0    | 0.1766      | 17082.6974 | 0.2512       | 36411.2554 | 0.0428        | 201015.8026 |
|                 | bvar.d0   | 0.3511      | 15559.4793 | 0.4771       | 33185.9076 | 0.0414        | 200995.2753 |
|                 | bvar.l.d0 | 0.2710      | 15833.4321 | 0.3549       | 34136.7378 | 0.0414        | 200996.0848 |
| Fagales         | bcstd0    | 0.2152      | 2175.1509  | 0.3133       | 3348.9589  | 0.0682        | 15339.8582  |
|                 | bvar.d0   | 0.5895      | 1731.1818  | 0.7304       | 2647.4577  | 0.0590        | 15290.6216  |
|                 | bvar.l.d0 | 0.3434      | 1877.0250  | 0.4537       | 2903.7101  | 0.0474        | 15247.3844  |
| Geraniales      | bcstd0    | 0.1269      | 1024.4885  | 0.2149       | 2002.0945  | 0.0666        | 7644.1400   |
|                 | bvar.d0   | 0.3037      | 897.5662   | 0.4418       | 1750.0863  | 0.0526        | 7586.1561   |
|                 | bvar.l.d0 | 0.1948      | 938.5702   | 0.2831       | 1857.2251  | 0.0965        | 7219.1370   |
| Huerteales      | bcstd0    | 0.0340      | 53.3417    | 0.0364       | 52.4816    | 0.0588        | 201.4799    |
|                 | bvar.d0   | 0.0236      | 57.2549    | 0.0193       | 55.9275    | 0.1375        | 191.6220    |
|                 | bvar.l.d0 | 0.0406      | 56.4587    | 0.0488       | 54.3704    | 0.0983        | 189.0625    |
| Malpighiales    | bcst.d0   | 0.1469      | 15767.0844 | 0.1913       | 27825.9404 | 0.0634        | 162063.7479 |
|                 | bvar.d0   | 0.2886      | 14403.6833 | 0.3598       | 25624.2147 | 0.0460        | 159722.4805 |
|                 | bvar.l.d0 | 0.2149      | 14709.3851 | 0.2678       | 26345.6577 | 0.0183        | 157435.2067 |
| Malvales        | bcst.d0   | 0.2273      | 5794.3818  | 0.2483       | 9076.1751  | 0.0949        | 52668.8427  |
|                 | bvar.d0   | 0.4367      | 5238.2738  | 0.4667       | 8264.4406  | 0.0644        | 51217.2303  |
|                 | bvar.l.d0 | 0.2938      | 5435.2560  | 0.3249       | 8589.0617  | 0.0013        | 49127.5910  |

|               |           |                  |                   |        |             |
|---------------|-----------|------------------|-------------------|--------|-------------|
|               | bcst.d0   | 0.20805717.0573  | 0.273010113.4779  | 0.0505 | 125889.5715 |
| Myrtales      | bvar.d0   | 0.44005077.4518  | 0.58398834.0057   | 0.0233 | 119260.9675 |
|               | bvar.l.d0 | 0.32585238.8693  | 0.38159307.2210   | 0.0030 | 116364.9189 |
|               | bcst.d0   | 0.1523904.2727   | 0.16311590.7540   | 0.0661 | 16740.3727  |
| Oxalidales    | bvar.d0   | 0.3555775.1138   | 0.33081422.6776   | 0.0551 | 16670.1458  |
|               | bvar.l.d0 | 0.2326813.4359   | 0.23341472.4350   | 0.0498 | 16649.3403  |
|               | bcst.d0   | 0.077133.2976    | 0.076533.3390     | 0.0246 | 453.6749    |
| Picramniales  | bvar.d0   | 0.225437.7802    | 0.222537.9161     | 0.0040 | 393.1063    |
|               | bvar.l.d0 | 0.153337.9626    | 0.150138.2132     | 0.0206 | 381.9055    |
|               | bcst.d0   | 0.18606691.5289  | 0.286712609.0191  | 0.0274 | 125274.7839 |
| Rosales       | bvar.d0   | 0.50345742.5722  | 0.701910588.9277  | 0.0201 | 124562.9518 |
|               | bvar.l.d0 | 0.30376100.8188  | 0.409411492.3028  | 0.0505 | 123451.0228 |
|               | bcst.d0   | 0.19986175.3200  | 0.20759430.4204   | 0.0618 | 42588.6735  |
| Sapindales    | bvar.d0   | 0.33735790.9788  | 0.33628909.3196   | 0.0433 | 41993.2414  |
|               | bvar.l.d0 | 0.27765848.4990  | 0.28299017.1770   | 0.0269 | 41719.7220  |
|               | bcst.d0   | 0.1425445.4461   | 0.0756608.9782    | 0.0334 | 11141.7598  |
| Vitales       | bvar.d0   | 0.3633395.9158   | 0.1300589.7110    | 0.0049 | 10011.3497  |
|               | bvar.l.d0 | 0.2211410.6484   | 0.1001595.9946    | 0.0498 | 10250.6331  |
|               | bcst.d0   | 0.0811415.5112   | 0.1503985.5402    | 0.0559 | 2853.6877   |
| Zygophyllales | bvar.d0   | 0.1611391.7703   | 0.3397892.6860    | 0.0366 | 2810.7790   |
|               | bvar.l.d0 | 0.1335388.3089   | 0.2199928.0631    | 0.0258 | 2800.5617   |
|               | bcst.d0   | 0.176272491.7990 | 0.2308135337.7719 | 0.0491 | 858296.7190 |
| Whole tree    | bvar.d0   | 0.358065352.1952 | 0.4460122542.2358 | 0.0456 | 857711.7141 |
|               | bvar.l.d0 | 0.251767402.6815 | 0.3140127081.6083 | 0.0446 | 857591.7899 |

**Appendix S3c. Rate comparison for 20k-tip tree under birth-death model and pure-birth model in BAMM analysis.** The procedures are the same as it described in Appendix S1a, except using pure-birth model (setting “updateRateMu0 = 0” and “muInit0 = 0.0”; see BAMM project website: <http://bamm-project.org/advanced.html#modeling-less-complex-evolutionary-scenarios>).

| Order                       | Birth-death model |          | Pure-birth model |          |
|-----------------------------|-------------------|----------|------------------|----------|
|                             | tree-wide rate    | tip rate | tree-wide rate   | tip rate |
| Brassicales                 | 0.3953            | 0.7258   | 0.0973           | 0.5903   |
| Celastrales                 | 0.2910            | 0.6069   | 0.0935           | 0.3429   |
| Crossosomatales             | 0.1771            | 0.2153   | 0.0484           | 0.2244   |
| Cucurbitales                | 0.1576            | 0.4176   | 0.0733           | 0.3909   |
| Fabales                     | 0.4219            | 1.0855   | 0.1060           | 0.7670   |
| Fagales                     | 1.6606            | 1.4678   | 0.0908           | 0.8060   |
| Geraniales                  | 0.5363            | 0.6265   | 0.0880           | 0.3882   |
| Huerteales                  | 0.0759            | 0.0497   | 0.0385           | 0.0268   |
| Malpighiales                | 0.4140            | 0.7197   | 0.0872           | 0.5068   |
| Malvales                    | 0.4837            | 1.2493   | 0.0987           | 0.6544   |
| Myrtales                    | 1.0803            | 1.6819   | 0.1179           | 0.7076   |
| Oxalidales                  | 0.8116            | 0.8827   | 0.0949           | 0.3003   |
| Picramniales                | 0.2743            | 0.2846   | 0.0789           | 0.0813   |
| Rosales                     | 1.6255            | 2.4513   | 0.1128           | 1.1257   |
| Sapindales                  | 0.1500            | 0.4871   | 0.1052           | 0.3892   |
| Vitales                     | 0.7648            | 0.9796   | 0.1045           | 0.4914   |
| Zygophyllales               | 0.2026            | 0.2164   | 0.0663           | 0.0926   |
| global tree<br>(mean value) | 0.5601            | 1.0731   | 0.0884           | 0.4639   |

**Appendix S3d.** Comparison of rate-through-time plots for each of the 17 rosid orders from 20k-tip tree under birth-death model (solid line) and pure-birth model (dashed line), respectively.

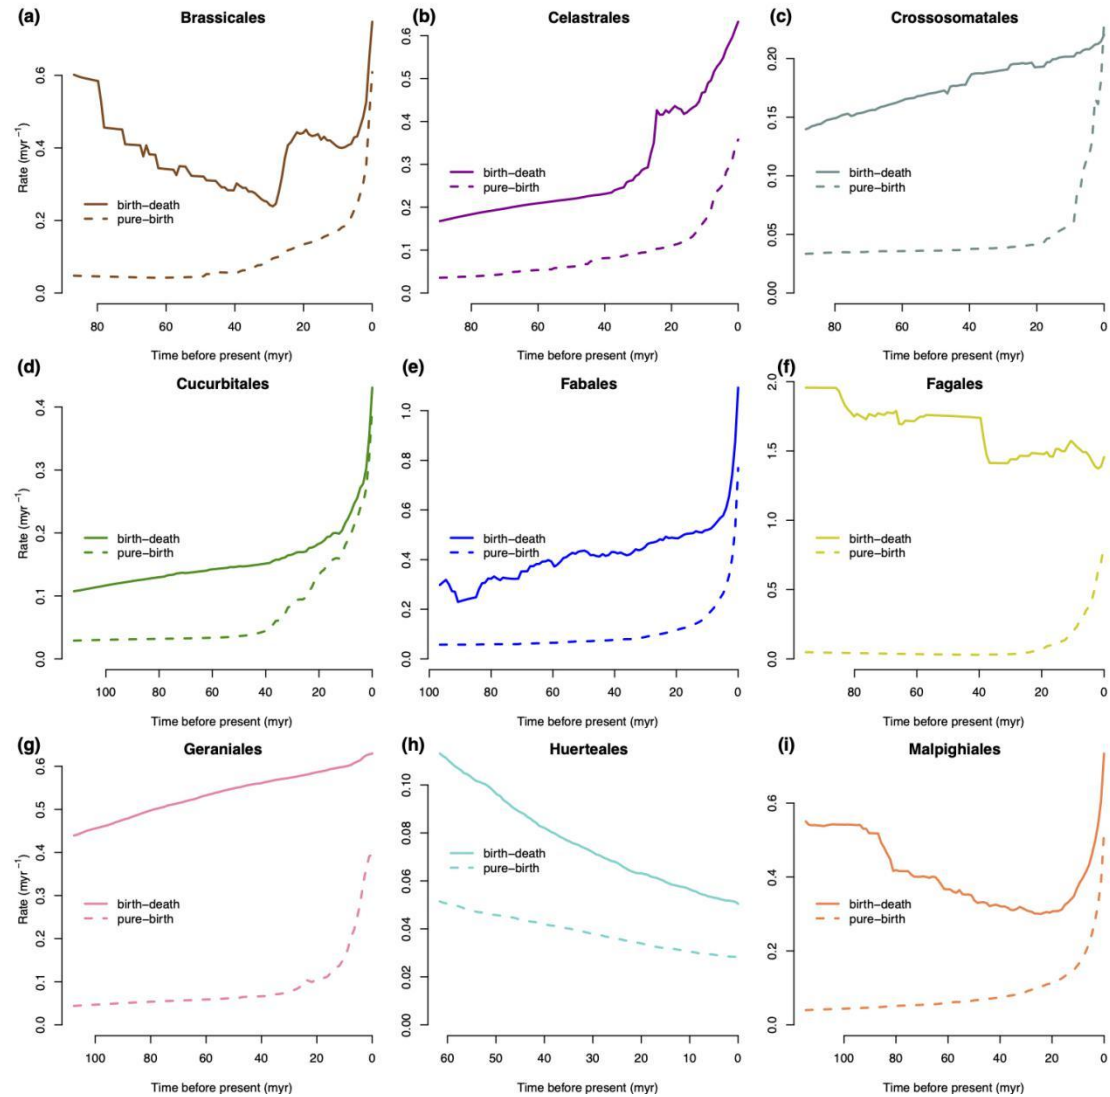

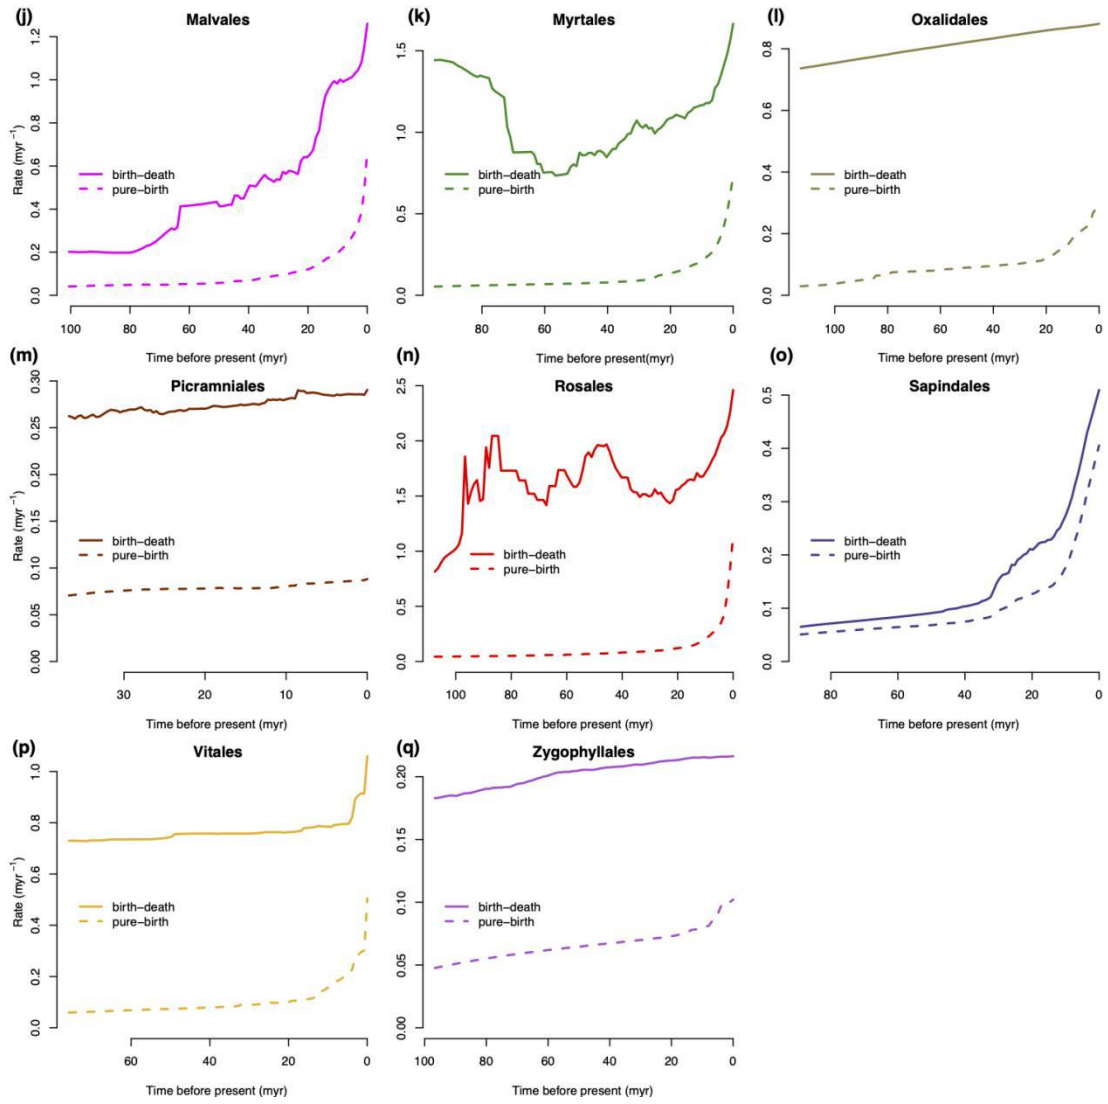

Supplement: AJB2-107-895-s003.pdf [file AJB2-107-895-s003.pdf]
