# Supplementary material for: Estimating rates and patterns of diversification with incomplete sampling: a case study in the rosids
Source: PubMed Central journal article supplement — Am J Bot. 2020 Jun 9;107(6):895–909. doi: 10.1002/ajb2.1479 (PMC7384126; doi:10.1002/ajb2.1479), 2020-06-09
Supplement: AJB2-107-895-s001.pdf [file AJB2-107-895-s001.pdf]

**Appendix S1a: Diversification analyses implemented by RPANDA**

We used RPANDA v1.4 (Morlon et al., 2016) to fit birth-death models for all the three time-calibrated rosid trees (9k-, 20k- and 100k-tip; Morlon, 2014; Morlon et al., 2016), as well as their 17 order-level clades (recognized by APG IV [2016]). We tested 9 likelihood-based time-dependent diversification models:

- 1) Pure birth model, no extinction rate ( $\mu$ ,  $\mu = 0$ ), and constant speciation rate ( $\lambda$ ,

$\lambda$ ; hereafter **bcst.d0**)

# t is time

# y is a vector of initial values feeding to the functions of  $\lambda$  and  $\mu$

*f.lamb* = function(t, y){y[1]}

*f.mu* = function(t, y){0}

- 2) Birth-death model with constant speciation and extinction (here as **bcst.dcst**)

*f.lamb* = function(t, y){y[1]}

*f.mu* = function(t, y){y[1]}

- 3) Pure birth model with exponential variation in speciation rate (here as **bvar.d0**)

*f.lamb* = function(t, y){y[1] \* exp(y[2] \* t)}

*f.mu* = function(t, y){0}

- 4) Pure birth model with linear variation in speciation rate (here as **bvar.l.d0**)

*f.lamb* = function(t, y){y[1] + y[2] \* t}

*f.mu* = function(t, y){0}

- 5) Birth-death model with exponential variation in speciation rate and constant

extinction (here as **bvar.dcst**)

$$f.lamb = function(t, y)\{y[1] * exp(y[2] * t)\}$$

$$f.mu = function(t, y)\{y[1]\}$$

6) Birth-death model with linear variation in speciation rate and constant extinction

(here as **bvar.l.dcst**)

$$f.lamb = function(t, y)\{y[1] + y[2] * t\}$$

$$f.mu = function(t, y)\{y[1]\}$$

7) Birth-death model with a constant speciation rate and exponential variation in

extinction (here as **bcst.dvar**)

$$f.lamb = function(t, y)\{y[1]\}$$

$$f.mu = function(t,y)\{y[1] * exp(y[2] * t)\}$$

8) Birth-death model with a constant speciation rate and linear variation in extinction

(here as **bcst.dvar.l**)

$$f.lamb = function(t, y)\{y[1]\}$$

$$f.mu = function(t,y)\{y[1] + y[2] * t\}$$

9) Birth-death model with exponential variation in speciation and extinction (here as

**bvar.dvar**)

$$f.lamb = function(t, y)\{y[1] * exp(y[2] * t)\}$$

$$f.mu = function(t,y)\{y[1] * exp(y[2] * t)\}$$

These nine birth-death models were calculated using the function “*fit\_bd*” (Morlon et al., 2016). We compared AIC values (Akaike Information Criterion; Akaike, 1974) and calculated Akaike weights (Wagenmakers and Farrell, 2004) to quantify relative model support and choose

the best model. Then we report the best model, speciation rate ( $\lambda$ ), AICc and AW under the best model estimated for 9k-, 20k, and 100k-tip trees and each of 17 rosid orders from these trees using RPANDA with nine birth-death models mentioned above. Then the  $\lambda$  is used to compare among different clades/trees and other diversification metrics across (see Appendix S2b).

## Appendix S1b: Diversification analyses implemented by BAMM

We also performed diversification analyses in BAMM (Bayesian Analysis of Macroevolutionary Mixtures; v2.5.0; Rabosky, 2014) to evaluate speciation rates, examining both tip rates (speciation rates at the present) and tree-wide speciation rates (that is, speciation rates across all tree timeframes including the present), as well as rate-through-time plots. BAMM is able to account for non-random and incomplete sampling, allowing the user to assign tips to clades (e.g., genera in our case) and indicate the total proportion (i.e., sampling fraction) of the clade sampled within the phylogeny (see Rabosky, 2014; BAMM project website: <http://bamm-project.org/advanced.html#incompsampling>). The initial values are set to 1.0 and 0.0, respectively, for speciation rate and extinction rate at assumed constant rate diversification within BAMM, however, these defaults at the tip of the tree can be adjusted by sampling fraction ( $f$ ) mentioned above as speciation rate =  $f$  and extinction rate =  $1-f$  (FitzJohn et al., 2009; Rabosky, 2014).

To examine common alternative practices for accounting for unsampled species in BAMM, we explored the impact of using global sampling probabilities (comprising one parameter of missing species for the entire tree) and species-specific sampling probabilities (comprising missing species parameters for arbitrarily defined clades, often named taxa) on diversification rates implemented in BAMM. For this method, it would require excessive computational resources for BAMM to reach MCMC convergence for the entire 20k-tip and 100k-tip trees. To deal with potential convergence issues, we compared the diversification result from independent analyses of 17 subtrees representing recognized orders recovered in 9k-, 20k-, and 100k-tip rosid trees. We calculated subtree diversification analyses in the same manner for all the 17 rosid orders to render the diversification results comparable. In most cases, four

independent MCMC chains of 20,000,000 generations were run for each analysis. The initial rate values and rate shift priors were estimated using the R package “BAMMtools” v2.1.6 (Rabosky, 2014) with the “*setBAMMpriors*” function. For larger rosid subclades, the number of generations in MCMC chains, the number of expected shifts, and rate priors were manually adjusted to ensure MCMC convergence. Parameter effective sample sizes (>200 for both the number of shifts and log likelihoods) and convergence among chains were assessed in the R package “coda” v0.19-1 (Plummer et al., 2006). After removing 10% of the trees as burn-in, we explored the BAMM output using BAMMtools to summarize tip and tree-wide speciation rates. We accounted for recent criticism of BAMM (May and Moore, 2016; Moore et al., 2016; Meyer and Wiens, 2017; Meyer et al., 2018), by comparing BAMM rates with those estimated using RPANDA (Morlon et al., 2016) and DR (Jetz et al., 2012) and using the most updated version of BAMM and BAMMtools (Rabosky et al., 2017), considering the author’s response notes (Rabosky, 2018a,b).

## Literature Cited

- Akaike, H. 1974. A new look at the statistical model identification. *IEEE Transactions on Automatic Control* 19: 716–723.
- APG IV. 2016. An update of the Angiosperm Phylogeny Group classification for the orders and families of flowering plants: APG IV. *Botanical journal of the Linnean Society* 181: 1–20.
- FitzJohn, R., Maddison, W. P., and Otto, S. P. 2009. Estimating trait-dependent speciation and extinction rates from incompletely resolved phylogenies. *Systematic Biology* 58: 595–611.
- May, M. R., and B. R. Moore. 2016. How well can we detect lineage-specific diversification-rate shifts? A simulation study of sequential AIC methods. *Systematic Biology* 65: 1076–1084.
- Meyer, A., and J. J. Wiens. 2017. Estimating diversification rates for higher taxa: BAMM can give problematic estimate of rates and rate shifts. *Evolution* 72: 39–53.
- Meyer, A., C. Roman-Palacios, and J. J. Wiens. 2018. BAMM gives misleading rate estimates in simulated and empirical datasets. *Evolution* 72: 2257–2266.
- Moore, B. R., S. Höhna, M. R. May, B. Rannala, and J. P. Huelsenbeck. 2016. Critically evaluating the theory and performance of Bayesian analysis of macroevolutionary mixtures. *Proceedings of the National Academy of Sciences, USA* 113: 9569–9574.
- Morlon, H. 2014. Phylogenetic approaches for studying diversification. *Ecology Letter* 17: 508–525.
- Morlon, H., E. Lewitus, C F. L. ondamine, M. Manceau, J. Clavel, and J. Drury. 2016. RPANDA: an R package for macroevolutionary analyses on phylogenetic trees. *Methods in Ecology and Evolution* 7: 589–597.
- Plummer, M., N. Best, K. Cowles, and K. Vines. 2006. CODA: convergence diagnosis and

- output analysis for MCMC. *R news* 6: 7–11.
- Rabosky, D. L. 2014. Automatic Detection of Key Innovations, Rate Shifts, and Diversity-Dependence on Phylogenetic Trees. *PLoS ONE* 9: e89543.
- Rabosky, D. L., J. S. Mitchell, and J. Chang. 2017. Is BAMM flawed? Theoretical and practical concerns in the analysis of multi-rate diversification models. *Systematic Biology* 66: 477–498.
- Rabosky, D. L. 2018a. BAMM at the court of false equivalency: a response to Meyer and Wiens. *Evolution* 72: 2246–2256.
- Rabosky, D. L. 2018b. Phylogenies and diversification rates: variance cannot be ignored. *Systematic Biology* 68: 538–550.
- Wagenmakers, E. J., and S. Farrell. 2004. AIC model selection using Akaike weights. *Psychonomic Bulletin & Review* 11: 192–196.
