# Supplementary material for: Estimating rates and patterns of diversification with incomplete sampling: a case study in the rosids
Source: PubMed Central journal article supplement — Am J Bot. 2020 Jun 9;107(6):895–909. doi: 10.1002/ajb2.1479 (PMC7384126; doi:10.1002/ajb2.1479), 2020-06-09
Supplement: AJB2-107-895-s002.pdf [file AJB2-107-895-s002.pdf]

Sun et al.—American Journal of Botany 2019 – Appendix S2

Appendix S2a. Summary table for BAMM analyses (also see Appendix S1.2).

| Order                       | 9k-tip tree |           |                |          | 20k-tip tree |           |                |          | 100k-tip tree |           |                |          |
|-----------------------------|-------------|-----------|----------------|----------|--------------|-----------|----------------|----------|---------------|-----------|----------------|----------|
|                             | ES_N_shift  | ES_logLik | tree-wide rate | tip rate | ES_N_shift   | ES_logLik | tree-wide rate | tip rate | ES_N_shift    | ES_logLik | tree-wide rate | tip rate |
| Brassicales                 | 661.10      | 534.45    | 0.7003         | 0.5881   | 1359.32      | 2430.96   | 0.3953         | 0.7258   | 4579.84       | 20.46     | 0.4221         | 0.0893   |
| Celastrales                 | 2737.53     | 1967.85   | 0.6262         | 0.7583   | 588.06       | 490.94    | 0.2910         | 0.6069   | 13493.91      | 227.97    | 0.3116         | 0.1369   |
| Crossosomatales             | 371.53      | 313.11    | 0.1722         | 0.2329   | 781.13       | 494.86    | 0.1771         | 0.2153   | 3550.46       | 2256.42   | 0.0575         | 0.1481   |
| Cucurbitales                | 2507.29     | 2146.06   | 0.3319         | 0.5083   | 600.01       | 230.90    | 0.1576         | 0.4176   | 3859.70       | 204.98    | 0.3308         | 0.0680   |
| Fabales                     | 217.63      | 321.51    | 0.7193         | 1.0854   | 851.79       | 399.77    | 0.4219         | 1.0855   | 22.90         | 5.74      | 0.9133         | 0.0619   |
| Fagales                     | 37614.85    | 946.02    | 2.4111         | 2.4074   | 469.09       | 266.18    | 1.6606         | 1.4678   | 407.51        | 1892.23   | 0.3297         | 0.1291   |
| Geraniales                  | 278.96      | 203.93    | 0.4018         | 0.6493   | 395.97       | 241.41    | 0.5363         | 0.6265   | 1484.07       | 429.74    | 0.3165         | 0.1272   |
| Huertales                   | 901.00      | 901.00    | 0.0668         | 0.0514   | 782.36       | 995.11    | 0.0759         | 0.0497   | 8418.80       | 9001.00   | 0.0451         | 0.3934   |
| Malpighiales                | 214.93      | 347.15    | 0.5830         | 0.7354   | 784.08       | 2226.57   | 0.4140         | 0.7197   | 139.44        | 4.75      | 0.3832         | 0.0789   |
| Malvales                    | 298.29      | 349.14    | 0.7598         | 1.2517   | 2946.91      | 815.99    | 0.4837         | 1.2493   | 10250.54      | 4915.10   | 0.3104         | 0.1140   |
| Myrtales                    | 891.38      | 599.38    | 1.0880         | 1.3626   | 2015.80      | 1439.91   | 1.0803         | 1.6819   | 4.84          | 2.77      | 0.2143         | 0.0433   |
| Oxalidales                  | 257011.88   | 2615.28   | 0.8868         | 0.9800   | 552.70       | 595.89    | 0.8116         | 0.8827   | 523.91        | 1024.82   | 0.3593         | 0.1454   |
| Picramniales                | 782.52      | 901.00    | 0.2804         | 0.2911   | 520.72       | 251.23    | 0.2743         | 0.2846   | 90224.85      | 1843.17   | 0.3092         | 0.0569   |
| Rosales                     | 400.78      | 343.11    | 2.4848         | 3.2572   | 901.00       | 901.00    | 1.6255         | 2.4513   | 376.55        | 8.51      | 0.4346         | 0.0614   |
| Sapindales                  | 685.37      | 732.94    | 0.4323         | 0.6527   | 560.40       | 815.48    | 0.1500         | 0.4871   | 7874.50       | 106.53    | 0.2942         | 0.0890   |
| Vitales                     | 901.00      | 217.16    | 1.1109         | 1.1640   | 272.24       | 378.22    | 0.7648         | 0.9796   | 7046.82       | 1646.90   | 1.1542         | 0.0561   |
| Zygophyllales               | 901.00      | 652.91    | 0.2535         | 0.2831   | 901.00       | 770.95    | 0.2026         | 0.2164   | 389.49        | 229.85    | 0.4687         | 0.1325   |
| global tree<br>(mean value) | /           | /         | 0.7829         | 1.1527   | /            | /         | 0.5601         | 1.0731   | /             | /         | 0.3914         | 0.1136   |

Notes:

“ES\_N\_shift” and “ES\_logLik” mean the number of shifts (ES\_N\_shift) and the log-Likelihood (ES\_logLik); two values used to assess post-burn-in effective sample sizes (>200) and convergence among chains (BAMM manual).

Tree-wide rate is the speciation rate across all tree timeframes including the present, obtained from the rate-through-time matrix; unit

is  $\text{Myr}^{-1}$ .

Tip rate estimated from the “*getTipRates*” function in BAMMtools; unit is  $\text{Myr}^{-1}$ .

BAMM analyses for the 100k-tip tree, for which 6 orders (Brassicales, Fabales, Malpighiales, Myrtales, Rosales, and Sapindales) could not reach suitable effective sample sizes despite runs in some cases exceeding 400 million generations.

**Appendix S2b.** Best models and speciation rates estimated for 9k-, 20k, and 100k-tip trees and each of 17 rosid orders from these trees using RPANDA with nine birth-death models (cf. Appendix S1.1).

| Order           | 9k-tip tree |           |           | 20k-tip tree |             |           | 100k-tip tree |         |             |           |             |         |
|-----------------|-------------|-----------|-----------|--------------|-------------|-----------|---------------|---------|-------------|-----------|-------------|---------|
|                 | Model       | $\lambda$ | AICc      | AW           | Model       | $\lambda$ | AICc          | AW      | Model       | $\lambda$ | AICc        | AW      |
| Brassicales     | bvar.dest   | 0.7079172 | 3688.8008 | 0.21165      | bvar.dvar   | 0.9421    | 10307.214     | 0.80624 | bvar.l.d0   | 0.0470732 | 43736.32198 | 0.73157 |
| Celastrales     | bvar.dest   | 0.8434964 | 1355.5334 | 0.27767      | bvar.dest   | 0.7436    | 1808.7929     | 0.28739 | bvar.l.d0   | 0.0521688 | 11284.71122 | 0.7319  |
| Crossosomatales | bcst.dest   | 0.3074763 | 185.80348 | 0.4336       | bcst.dest   | 0.2968    | 186.51977     | 0.42584 | bvar.l.d0   | 0.1289888 | 532.7036932 | 0.35819 |
| Cucurbitales    | bvar.dvar   | 0.623294  | 2945.1235 | 0.99423      | bvar.dvar   | 0.5014    | 5275.453      | 0.8382  | bvar.l.dest | 0.0295644 | 23178.99171 | 1       |
| Fabales         | bcst.dest   | 1.3051584 | 14884.703 | 0.37936      | bcst.dest   | 1.2903    | 31594.913     | 0.46384 | bvar.d0     | 0.0414453 | 200995.2753 | 0.41474 |
| Fagales         | bcst.dest   | 2.5222767 | 1581.8546 | 0.44699      | bcst.dest   | 2.026     | 2539.5318     | 0.47781 | bvar.l.d0   | 0.0474186 | 15247.38435 | 0.73163 |
| Geraniales      | bcst.dest   | 1.1756385 | 853.5773  | 0.42802      | bvar.dvar   | 0.8114    | 1725.0176     | 0.4725  | bvar.l.d0   | 0.0965253 | 7219.136959 | 1       |
| Huerteales      | bcst.d0     | 0.0340313 | 53.341706 | 0.66871      | bcst.d0     | 0.0364    | 52.481626     | 0.58234 | bcst.dvar.l | 0.2649092 | 174.6549247 | 0.50422 |
| Malpighiales    | bvar.dvar   | 0.9434892 | 13935.882 | 0.28884      | bvar.dest   | 0.9758    | 24684.048     | 0.21372 | bvar.l.d0   | 0.0182802 | 157435.2067 | 0.73093 |
| Malvales        | bvar.dest   | 1.4992228 | 5011.1028 | 0.28675      | bvar.dest   | 1.3722    | 7881.9606     | 0.32356 | bvar.l.d0   | -0.001315 | 49127.59102 | 0.73125 |
| Myrtales        | bcst.dest   | 2.3182921 | 4809.0756 | 0.24044      | bvar.dest   | 2.4124    | 8268.0079     | 0.29772 | bvar.l.dest | -0.006568 | 116233.782  | 1       |
| Oxalidales      | bcst.dvar.l | 1.4855975 | 753.60331 | 0.53209      | bcst.dvar.l | 1.0214    | 1388.6102     | 0.37694 | bvar.l.d0   | 0.0497701 | 16649.34027 | 0.73159 |
| Picramniales    | bcst.d0     | 0.0771328 | 33.297635 | 0.72901      | bcst.d0     | 0.0765    | 33.33898      | 0.73159 | bvar.l.dest | 0.0372405 | 370.5424775 | 0.99659 |
| Rosales         | bvar.dvar   | 4.6098893 | 4950.3889 | 0.95931      | bcst.dest   | 3.056     | 9485.4273     | 0.44212 | bvar.dvar   | 0.0258025 | 116962.3346 | 1       |
| Sapindales      | bvar.dvar   | 0.6382086 | 5733.1687 | 0.5147       | bvar.dvar   | 0.5313    | 8847.7864     | 0.92422 | bvar.l.d0   | 0.0269303 | 41719.72204 | 0.73135 |
| Zygophyllales   | bcst.dest   | 0.4179997 | 385.42321 | 0.4215       | bcst.dest   | 0.2635    | 582.47463     | 0.40309 | bvar.l.d0   | 0.0257752 | 2800.561744 | 0.72948 |
| Vitales         | bvar.dvar   | 11.214279 | 335.58215 | 0.99296      | bcst.dest   | 1.5141    | 832.30451     | 0.27539 | bvar.dvar   | 0.0188394 | 9630.261453 | 0.83137 |
| global tree     | bvar.dvar   | 1.3904588 | 62217.036 | 0.38514      | bvar.dvar   | 1.3058    | 116622.39     | 0.50235 | bvar.l.d0   | 0.0445547 | 857591.7899 | 0.73367 |

Notes: Model: see Appendix S1.1 for further information.

AICc: the corrected Akaike Information Criterion (AICc) for the fitted model.

AW is Akaike weight (Wagenmakers and Farrell, 2004).

Lambda is the speciation rate ( $\lambda$ ) parameter estimated by the fitted birth-death model at the present, see *f.lamb* function in Morlon et al.

(2014); unit is Myr<sup>-1</sup>.

|

### Appendix S2c. Summary table for the DR statistic.

Mean DR tip rates were averaged across the 17 orders and the whole of 9k-, 20k-, and 100k-tip rosoid trees, respectively; unit is Myr<sup>-1</sup>.

| <b>Order</b>                | <b>9k-tip tree</b> | <b>20k-tip tree</b> | <b>100-k tip tree</b> |
|-----------------------------|--------------------|---------------------|-----------------------|
| Brassicales                 | 0.1216             | 0.5058              | 0.1125                |
| Celastrales                 | 0.1854             | 0.2210              | 0.0903                |
| Crossosomatales             | 0.0840             | 0.0764              | 0.1005                |
| Cucurbitales                | 0.2159             | 0.3055              | 0.0888                |
| Fabales                     | 0.1778             | 0.5975              | 0.1080                |
| Fagales                     | 0.3241             | 0.5777              | 0.0808                |
| Geraniales                  | 0.1538             | 0.3214              | 0.0915                |
| Huerteales                  | 0.0216             | 0.0222              | 0.1133                |
| Malpighiales                | 0.1284             | 0.3435              | 0.0931                |
| Malvales                    | 0.2466             | 0.4294              | 0.1129                |
| Myrtales                    | 0.1656             | 0.4217              | 0.0727                |
| Oxalidales                  | 0.0894             | 0.1854              | 0.1011                |
| Picramniales                | 0.0303             | 0.0312              | 0.0238                |
| Rosales                     | 0.3459             | 0.6392              | 0.0599                |
| Sapindales                  | 0.1910             | 0.2554              | 0.0804                |
| Vitales                     | 0.1126             | 0.5672              | 0.0450                |
| Zygophyllales               | 0.0555             | 0.0697              | 0.0673                |
| global tree<br>(mean value) | 0.1889             | 0.4644              | 0.0902                |

**Appendix S2d. Summary table for diversification simulations in the Cucurbitaceae test case.**

| Treatment                | Tip no.               | RPANDA    |           |         |         | Mean DR | BAMM                |               |        |
|--------------------------|-----------------------|-----------|-----------|---------|---------|---------|---------------------|---------------|--------|
|                          |                       | model     | $\lambda$ | AICc    | AW      |         | mean tree-wide rate | mean tip rate |        |
| Cucurbitaceae_20k_family | 528                   | bcst.dcst | 0.4635    | 2868.24 | 0.24    | 0.3794  | 0.2408              | 0.4625        |        |
| Cucurbitaceae_20k_genus  | 123                   | bvar.d0   | 0.2687    | 751.081 | 0.33    | 0.1052  | 0.2571              | 0.2543        |        |
| random drop              | Cucurbitaceae_20k_10% | 475       | bvar.dcst | 0.4688  | 2595.68 | 1.00    | 0.3599              | 0.2466        | 0.4658 |
|                          | Cucurbitaceae_20k_30% | 370       | bcst.dcst | 0.5471  | 2076.03 | 1.00    | 0.3282              | 0.2516        | 0.4951 |
|                          | Cucurbitaceae_20k_50% | 264       | bcst.dcst | 0.6283  | 1539.34 | 0.93    | 0.2731              | 0.2491        | 0.5010 |
|                          | Cucurbitaceae_20k_75% | 132       | bcst.dcst | 0.7264  | 822.306 | 0.51    | 0.1910              | 0.5261        | 0.6508 |
| backbone addition        | Cucurbitaceae_20k_10% | 528       | bcst.dcst | 0.3800  | 3016    | 1.00    | 0.3373              | 0.3871        | 0.4054 |
|                          | Cucurbitaceae_20k_30% | 528       | bvar.dvar | 0.1729  | 3297    | 0.96    | 0.2647              | 0.8536        | 0.3662 |
|                          | Cucurbitaceae_20k_50% | 528       | bvar.dvar | 0.1571  | 3382    | 1.00    | 0.2013              | 0.9608        | 0.3661 |
|                          | Cucurbitaceae_20k_75% | 528       | bvar.dvar | 0.0966  | 3276    | 1.00    | 0.1397              | 0.9545        | 0.3412 |

**Appendix S2e. Tukey HSD test across the RPANDA, BAMM, and DR methods for the Cucurbitaceae test case under the random taxon-dropping scenario.** p.adj means adjusted *p*-value. Values in boldface are significant.

RPANDA

| <b>treatment</b>          | <b>diff</b> | <b>lwr</b> | <b>upr</b> | <b>p.adj</b>    |
|---------------------------|-------------|------------|------------|-----------------|
| Cucurbitaceae 20k 30%—10% | 0.0754      | -0.0407    | 0.1916     | 0.31398         |
| Cucurbitaceae 20k 50%—10% | 0.1288      | 0.0127     | 0.2450     | 0.02482         |
| Cucurbitaceae 20k 75%—10% | 0.3644      | 0.2483     | 0.4806     | <b>2.70e-09</b> |
| Cucurbitaceae 20k 50%—30% | 0.0534      | -0.0627    | 0.1695     | 0.60715         |
| Cucurbitaceae 20k 75%—30% | 0.2890      | 0.1728     | 0.4051     | <b>4.77e-07</b> |
| Cucurbitaceae 20k 75%—50% | 0.2356      | 0.1194     | 0.3517     | <b>2.10e-05</b> |

BAMM tip rate

| <b>treatment</b>          | <b>diff</b> | <b>lwr</b> | <b>upr</b> | <b>p.adj</b> |
|---------------------------|-------------|------------|------------|--------------|
| Cucurbitaceae 20k 30%—10% | 0.0292      | 0.0029     | 0.0556     | 0.022429     |
| Cucurbitaceae 20k 50%—10% | 0.0352      | 0.0060     | 0.0643     | 0.010474     |
| Cucurbitaceae 20k 75%—10% | 0.1850      | 0.1476     | 0.2223     | <b>0</b>     |
| Cucurbitaceae 20k 50%—30% | 0.0059      | -0.0247    | 0.0365     | 0.959804     |
| Cucurbitaceae 20k 75%—30% | 0.1557      | 0.1172     | 0.1942     | <b>0</b>     |
| Cucurbitaceae 20k 75%—50% | 0.1498      | 0.1093     | 0.1903     | <b>0</b>     |

BAMM tree-wide rate

| <b>treatment</b>          | <b>diff</b> | <b>lwr</b> | <b>upr</b> | <b>p.adj</b>    |
|---------------------------|-------------|------------|------------|-----------------|
| Cucurbitaceae 20k 30%—10% | 0.0050      | -0.1111    | 0.1210     | 0.999446314     |
| Cucurbitaceae 20k 50%—10% | 0.0024      | -0.1136    | 0.1185     | 0.999933504     |
| Cucurbitaceae 20k 75%—10% | 0.2794      | 0.1634     | 0.3955     | <b>9.22e-07</b> |
| Cucurbitaceae 20k 50%—30% | -0.0025     | -0.1186    | 0.1136     | 0.999927428     |
| Cucurbitaceae 20k 75%—30% | 0.2745      | 0.1584     | 0.3906     | <b>1.31e-06</b> |
| Cucurbitaceae 20k 75%—50% | 0.2770      | 0.1609     | 0.3931     | <b>1.10e-06</b> |

DR

| <b>treatment</b>          | <b>diff</b> | <b>lwr</b> | <b>upr</b> | <b>p.adj</b>    |
|---------------------------|-------------|------------|------------|-----------------|
| Cucurbitaceae 20k 30%—10% | -0.0317     | -0.0497    | -0.0137    | <b>0.00019</b>  |
| Cucurbitaceae 20k 50%—10% | -0.0868     | -0.1048    | -0.0688    | <b>0</b>        |
| Cucurbitaceae 20k 75%—10% | -0.1689     | -0.1869    | -0.1509    | <b>0.00e+00</b> |
| Cucurbitaceae 20k 50%—30% | -0.0551     | -0.0731    | -0.0371    | <b>4.75e-09</b> |

|                           |         |         |         |                 |
|---------------------------|---------|---------|---------|-----------------|
| Cucurbitaceae 20k 75%—30% | -0.1372 | -0.1552 | -0.1192 | <b>0.00e+00</b> |
| Cucurbitaceae 20k 75%—50% | -0.0821 | -0.1001 | -0.0641 | <b>0.00e+00</b> |

---



**Appendix S2f. Tukey HSD test across the RPANDA, BAMM, and DR methods for the Cucurbitaceae test case under the backbone-addition scenario.**

p.adj means adjusted *p*-value. Values in boldface are significant.

**RPANDA**

| <b>treatment</b>          | <b>diff</b> | <b>lwr</b> | <b>upr</b> | <b>p.adj</b>      |
|---------------------------|-------------|------------|------------|-------------------|
| Cucurbitaceae 20k 30%—10% | -0.1220     | -0.2089    | -0.0352    | <b>0.00303004</b> |
| Cucurbitaceae 20k 50%—10% | -0.1993     | -0.2862    | -0.1124    | <b>2.34e-06</b>   |
| Cucurbitaceae 20k 75%—10% | -0.1951     | -0.2819    | -0.1082    | <b>3.49e-06</b>   |
| Cucurbitaceae 20k 50%—30% | -0.0773     | -0.1641    | 0.0096     | 0.09615573        |
| Cucurbitaceae 20k 75%—30% | -0.0730     | -0.1599    | 0.0138     | 0.12562993        |
| Cucurbitaceae 20k 75%—50% | 0.0042      | -0.0826    | 0.0911     | 0.99918405        |

**BAMM tip rate**

| <b>treatment</b>          | <b>diff</b> | <b>lwr</b> | <b>upr</b> | <b>p.adj</b>    |
|---------------------------|-------------|------------|------------|-----------------|
| Cucurbitaceae 20k 30%—10% | -0.0392     | -0.0595    | -0.0190    | <b>3.56e-06</b> |
| Cucurbitaceae 20k 50%—10% | -0.0393     | -0.0595    | -0.0191    | <b>3.47e-06</b> |
| Cucurbitaceae 20k 75%—10% | -0.0642     | -0.0844    | -0.0440    | <b>0</b>        |
| Cucurbitaceae 20k 50%—30% | 0.0000      | -0.0203    | 0.0202     | 0.999999951     |
| Cucurbitaceae 20k 75%—30% | -0.0249     | -0.0452    | -0.0047    | 0.008276584     |
| Cucurbitaceae 20k 75%—50% | -0.0249     | -0.0451    | -0.0047    | 0.00841872      |

**BAMM tree-wide rate**

| <b>treatment</b>          | <b>diff</b> | <b>lwr</b> | <b>upr</b> | <b>p.adj</b>    |
|---------------------------|-------------|------------|------------|-----------------|
| Cucurbitaceae 20k 30%—10% | 0.4664      | 0.3552     | 0.5777     | <b>1.06E-12</b> |
| Cucurbitaceae 20k 50%—10% | 0.5737      | 0.4625     | 0.6849     | <b>0</b>        |
| Cucurbitaceae 20k 75%—10% | 0.5674      | 0.4562     | 0.6786     | <b>0</b>        |
| Cucurbitaceae 20k 50%—30% | 0.1073      | -0.0040    | 0.2185     | 0.062090622     |
| Cucurbitaceae 20k 75%—30% | 0.1010      | -0.0103    | 0.2122     | 0.086624821     |
| Cucurbitaceae 20k 75%—50% | -0.0063     | -0.1175    | 0.1049     | 0.998705281     |

**DR**

| <b>treatment</b>          | <b>diff</b> | <b>lwr</b> | <b>upr</b> | <b>p.adj</b>    |
|---------------------------|-------------|------------|------------|-----------------|
| Cucurbitaceae 20k 30%—10% | -0.0725     | -0.0904    | -0.0546    | <b>3.11e-12</b> |
| Cucurbitaceae 20k 50%—10% | -0.1359     | -0.1538    | -0.1180    | <b>0</b>        |
| Cucurbitaceae 20k 75%—10% | -0.1976     | -0.2155    | -0.1797    | <b>0</b>        |
| Cucurbitaceae 20k 50%—30% | -0.0634     | -0.0813    | -0.0455    | <b>1.26e-10</b> |

---

|                           |         |         |         |                 |
|---------------------------|---------|---------|---------|-----------------|
| Cucurbitaceae 20k 75%—30% | -0.1251 | -0.1429 | -0.1072 | <b>0</b>        |
| Cucurbitaceae 20k 75%—50% | -0.0617 | -0.0795 | -0.0438 | <b>2.57e-10</b> |

---

**Appendix S2g. Summary table for diversification analyses in Cucurbitaceae test case under the representative sampling scenario.**

| genus tree                 | RPANDA    |        |         |        | BAMM            |               |                           |               | DR           |
|----------------------------|-----------|--------|---------|--------|-----------------|---------------|---------------------------|---------------|--------------|
|                            | Model     | lamda  | AICc    | AW     | global sampling |               | species-specific sampling |               | mean DR rate |
|                            |           |        |         |        | mean tree-wide  | mean tip rate | mean tree-wide            | mean tip rate |              |
| Cucurbitaceae 20k genus 1  | bvar.d0   | 0.2970 | 394.14  | 0.3164 | 0.2559          | 0.2469        | 0.1780                    | 0.1275        | 0.0883       |
| Cucurbitaceae 20k genus 2  | bvar.d0   | 0.3072 | 390.65  | 0.3188 | 0.2554          | 0.2391        | 0.1774                    | 0.1251        | 0.0868       |
| Cucurbitaceae 20k genus 3  | bvar.d0   | 0.3061 | 393.06  | 0.3193 | 0.2509          | 0.2401        | 0.1730                    | 0.1266        | 0.0858       |
| Cucurbitaceae 20k genus 4  | bvar.d0   | 0.2998 | 390.48  | 0.2950 | 0.2565          | 0.2494        | 0.1785                    | 0.1305        | 0.0877       |
| Cucurbitaceae 20k genus 5  | bvar.d0   | 0.3044 | 395.77  | 0.3145 | 0.2557          | 0.2408        | 0.1781                    | 0.1274        | 0.0898       |
| Cucurbitaceae 20k genus 6  | bvar.d0   | 0.3055 | 394.62  | 0.3367 | 0.2511          | 0.2487        | 0.1746                    | 0.1307        | 0.0885       |
| Cucurbitaceae 20k genus 7  | bvar.d0   | 0.2998 | 394.99  | 0.3244 | 0.2559          | 0.2445        | 0.1783                    | 0.1305        | 0.0891       |
| Cucurbitaceae 20k genus 8  | bvar.d0   | 0.2968 | 394.31  | 0.3151 | 0.2490          | 0.2373        | 0.1751                    | 0.1262        | 0.0861       |
| Cucurbitaceae 20k genus 9  | bvar.d0   | 0.3020 | 394.34  | 0.3263 | 0.2593          | 0.2545        | 0.1766                    | 0.1272        | 0.0875       |
| Cucurbitaceae 20k genus 10 | bvar.d0   | 0.3030 | 388.85  | 0.2934 | 0.2492          | 0.2354        | 0.1746                    | 0.1231        | 0.0858       |
| mean rates                 | /         | 0.3022 | /       | /      | 0.2539          | 0.2437        | 0.1764                    | 0.1275        | 0.0875       |
| Cucurbitaceae family tree  | best.dcst | 0.4635 | 2868.24 | 0.2406 | 0.2408          | 0.4625        | /                         | /             | 0.3794       |
